# Supplementary material for: Prognostic Nomogram in Children and Adolescents with Central Nervous System Germ Cell Tumors
Source: Research Square preprint supplement (doi:10.21203/rs.3.rs-934014/v1), 2021-10-05
Supplement: Supplementary file 1 [file 55d9dcd948b655c0e82ec183.docx]

**Supplementary Table 1. Detailed scores for all variables in nomogram**

| **Variable** | **Nomogram Score** |
| --- | --- |
| Site |  |
| Pineal gland | 83 |
| Pit/Cra gland | 0 |
| Other | 100 |
| Histological |  |
| GGCTs | 0 |
| NGGCTs | 76 |
| Size (cm) |  |
| <5cm | 0 |
| 5cm+ | 19 |
| Unknown | 53 |

GGCTs: Germinomatous germ cell tumors; NGGCTs: Nongerminomatous germ cell tumors; Pit/Cra gland: Pituitary gland/ Craniopharyngeal duct
